# Supplementary material for: A Case of Severe Left-Ventricular Noncompaction Associated with Splicing Altering Variant in the FHOD3 Gene
Source: MDPI journal article supplement (doi:10.3390/genes13020309), 2022-02-07
Supplement: s1 [file s1]

Supplementary Table S1. List of rare (MAF < 0,001% according to the gnomAD database) single nucleotide variants identified in the reported family.

| Position (hg38) | Gene         | Transcript     | cDNA change | Amino acid change | MAF       | II-2 | III-1 | III-2 | IV-1 | Pathogenicity class | ACMG criteria*     |
|-----------------|--------------|----------------|-------------|-------------------|-----------|------|-------|-------|------|---------------------|--------------------|
| chr2:73448907   | <i>ALMS1</i> | NM_015120.4    | c.2380G>T   | p.Ala794Ser       | NA        | 0/0  | 0/0   | 0/1   | 0/1  | LB                  | PM2, BP4, BS4      |
| chr5:128336003  | <i>FBN2</i>  | NM_001999.4    | c.3709C>T   | p.Arg1237Cys      | 0,0000197 | 0/0  | 0/0   | 0/1   | 0/1  | VUS                 | PM2, PP3, BS4      |
| chr8:143932128  | <i>PLEC</i>  | NM_201384.3    | c.2082+2T>G |                   | NA        | 0/0  | 0/0   | 0/1   | 0/0  | VUS                 | PM2, BS4           |
| chr12:21925942  | <i>ABCC9</i> | NM_020297.4    | c.406G>A    | p.Ala136Thr       | NA        | 0/0  | 0/1   | 0/1   | 0/0  | VUS                 | PM2, BP4           |
| chr18:36652930  | <i>FHOD3</i> | NM_001281740.3 | c.1646+1G>A |                   | NA        | 0/0  | 0/1   | 0/1   | 0/0  | LP                  | PM2, PM4, PM1, PP5 |

\* Abbreviations for criteria are provided in accordance with Richards et al. [16] and mean the following: PM1, located in a mutational hot spot and/or specific functional domain; PM2, absent or met at extremely low frequency in large populational databases; PM4, protein length changes due to in-frame deletions/insertions; PP3, multiple lines of *in silico* evidence indicate deleteriousness; PP5, reported as pathogenic by an independent reputable source; BS4, lack of cosegregation with the disease in the family; BP4, multiple lines of *in silico* evidence show absence of deleterious effects.

LB, likely benign; LP, likely pathogenic; VUS, variant of uncertain significance. 0/0 indicates the wildtype genotype, 0/1 indicates the presence of the variant in heterozygous state.
